# Supplementary material for: Red and White Meat Intake in Relation to Gut Flora in Obese and Non-Obese Arab Females
Source: MDPI journal article supplement (doi:10.3390/foods12020245), 2023-01-05
Supplement: s1 [file s1]

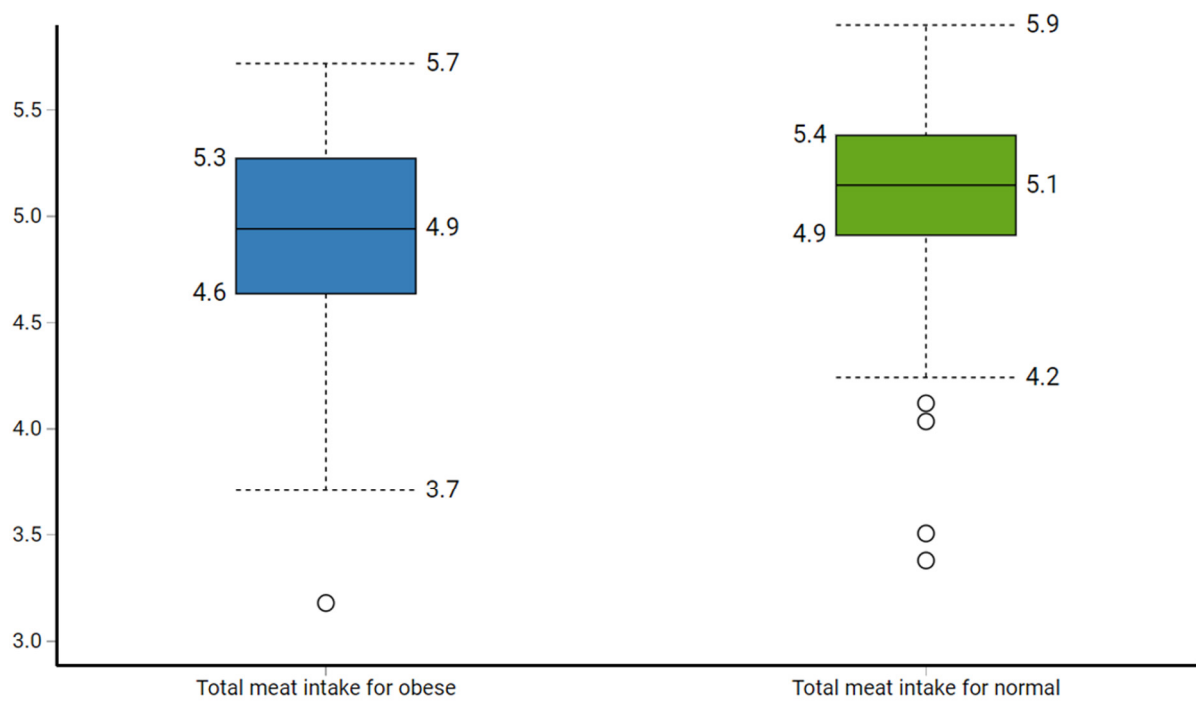

**Figure S1. Total meat intake across obese and non-obese groups (alpha diversity-Shanon)**

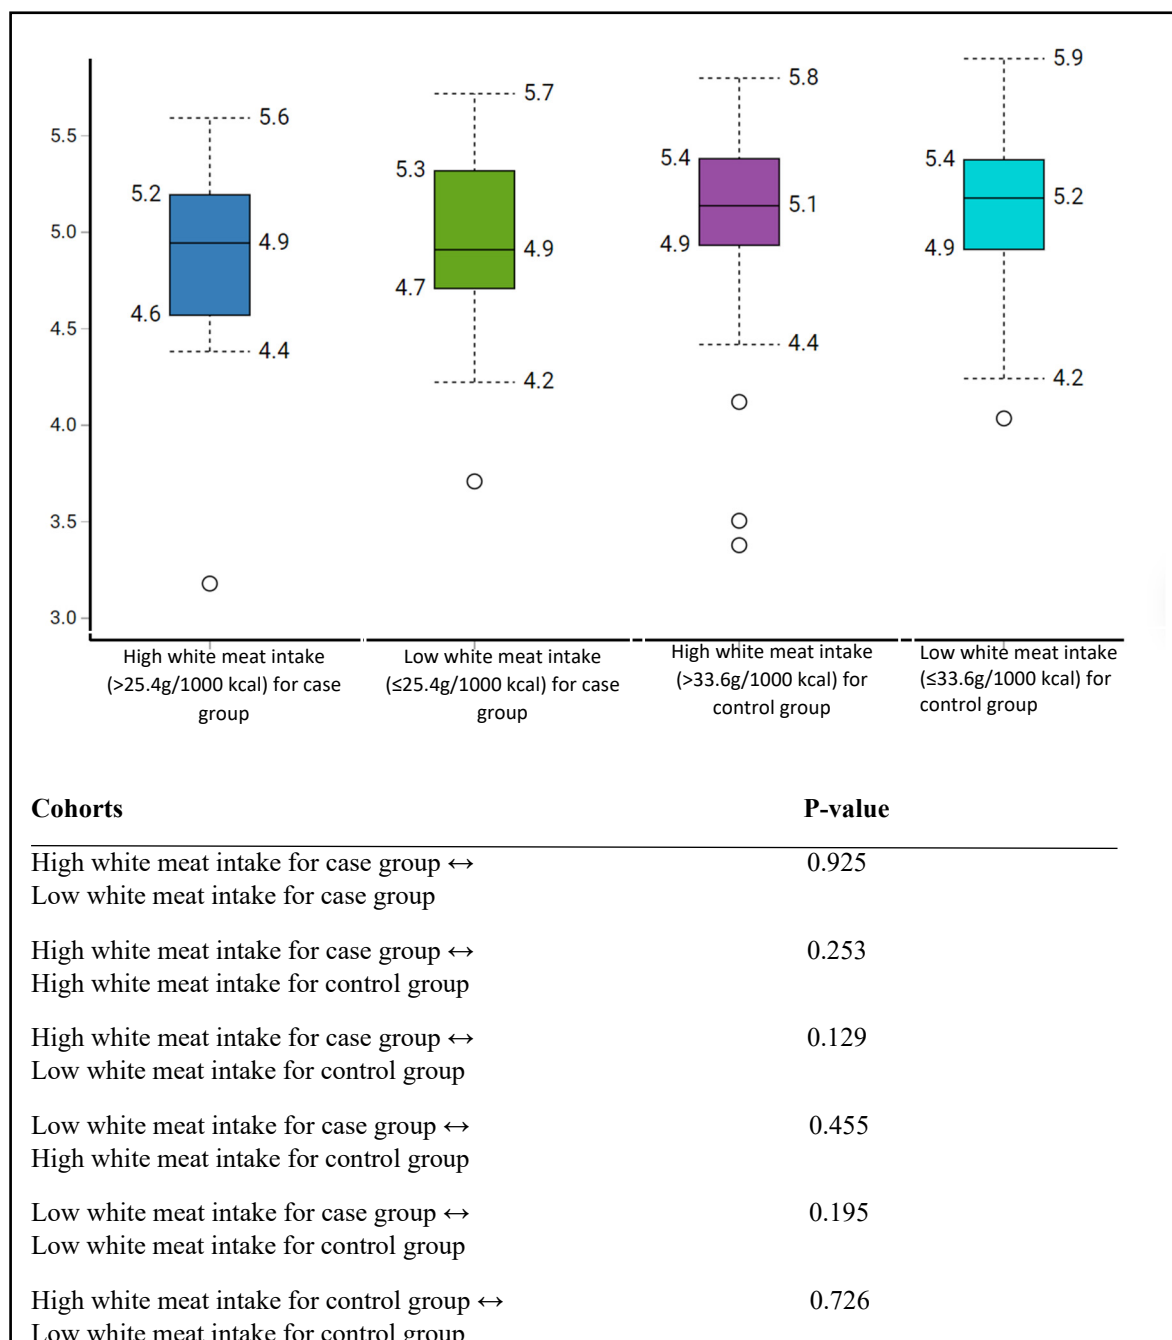

**Figure S2: High and low white meat intake across cases and controls (Alpha diversity-Shannon)**

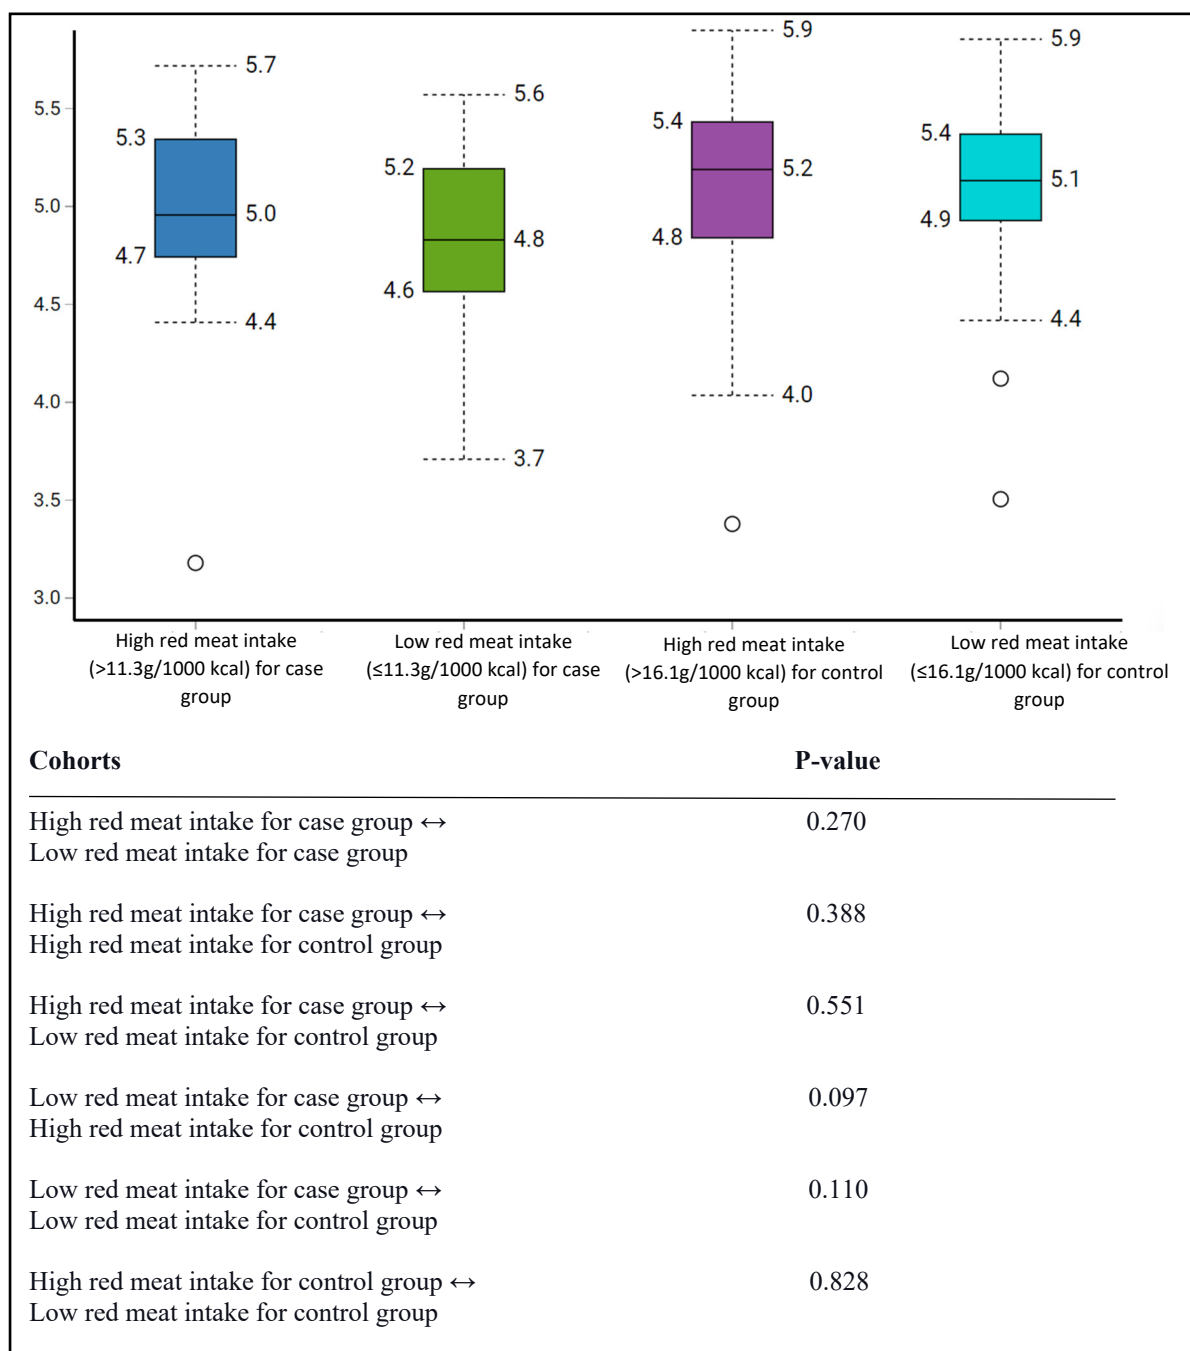

**Figure S3: High and low red meat intake across cases and controls (Alpha diversity-Shannon)**
